# Supplementary material for: Bioinformatical Analysis of Organ-Related (Heart, Brain, Liver, and Kidney) and Serum Proteomic Data to Identify Protein Regulation Patterns and Potential Sepsis Biomarkers
Source: Hindawi journal article supplement (doi:10.1155/2018/3576157), 2018-03-21
Supplement: f1 [file 3576157.f1.pdf]

## Supplementary Material

### Figures:

#### Suppl. Figure 1: Network analysis organs without serum.

In a GeneMANIA<sup>®</sup> network analysis each circle represents a gene. The input proteins/genes are depicted as striped circles of the same size, while the monochromatic circles, whose size is proportional to the number of interactions according to the software, can be considered as “relevant” related genes found by GeneMANIA<sup>®</sup> searching in many large, publicly available biological datasets (including protein-protein, protein-DNA and genetic interactions, pathways, reactions, gene and protein expression data, protein domains and phenotypic screening profiles). Lines linking different circles can be distinguished from their colour, mainly: violent represents co-expression (when expression levels are similar across conditions in a gene expression study); light orange represents predicted functional relationships between genes; light blue represents co-localization (when genes are expressed in the same tissue, or proteins found in the same location); light yellow represents shared protein domains (when two gene products have the same protein domain).

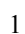

## Tables:

**Suppl. Table 1:** Fifty-one functions filtered by absolute number (cut-off  $\geq 7$ ) from the original 159 deriving from GeneMania<sup>®</sup> network analysis of the whole dataset without the serum proteins. Column 1 shows the functions names. Columns 2 and 3 show respectively the number of annotated genes in the displayed network and the number of genes with that annotation in the genome. In column 5: names in bold letters represent the genes predicted by the software.

| Function                                            | Genes in network | Genes in genome | Ratio  | Names                                                                                                                                                   |
|-----------------------------------------------------|------------------|-----------------|--------|---------------------------------------------------------------------------------------------------------------------------------------------------------|
| generation of precursor metabolites and energy      | 17               | 196             | 8'67%  | cps1, gnmt, ogdh, dlst, aco2, aldoa, gapdh, suclg2, eno1, fbp1, gpd1, aldh5a1, <b>acadm</b> , <b>mdh</b> , <b>ndufs1</b> , <b>mif</b> , <b>aldob</b>    |
| coenzyme metabolic process                          | 14               | 161             | 8'70%  | Gnmt, ogdh, dlst, fasn, suclg2, g6pd, acss1, gpd1, <b>mdh2</b> , <b>mdh1</b> , <b>dlat</b> , <b>acaa2</b> , <b>taldo1</b> , <b>adob</b>                 |
| cofactor metabolic process                          | 14               | 196             | 7'14%  | gnmt, aldoa, akr1a1, gapdh, eno1, g6pd, fbp1, gpd1, aldh5a1, <b>acadm</b> , <b>taldo1</b> , <b>mif</b> , <b>aldob</b> , <b>pc</b>                       |
| monosaccharide metabolic process                    | 14               | 199             | 7'04%  | Gnmt, ogdh, dlst, fasn, suclg2, g6pd, acss1, gpd1, <b>mdh2</b> , <b>mdh1</b> , <b>dlat</b> , <b>acaa2</b> , <b>taldo1</b> , <b>adob</b>                 |
| glucose metabolic process                           | 13               | 171             | 7'60%  | gnmt, aldoa, gapdh, eno1, g6pd, fbp1, gpd1, aldh5a1, <b>acadm</b> , <b>taldo1</b> , <b>mif</b> , <b>aldob</b> , <b>pc</b>                               |
| hexose metabolic process                            | 13               | 186             | 6'99%  | gnmt, aldoa, gapdh, eno1, g6pd, fbp1, gpd1, aldh5a1, <b>acadm</b> , <b>taldo1</b> , <b>mif</b> , <b>aldob</b> , <b>pc</b>                               |
| cellular amino acid metabolic process               | 12               | 257             | 4'67%  | gnmt, got1, glul, ckb, g6pd, ddah1, aldh5a1, ckmt1b, cps1, ivd, uroc1, <b>ckm</b>                                                                       |
| mitochondrial inner membrane                        | 12               | 269             | 4'46%  | cps1, hspd1, cox5b, <b>pc</b> , <b>acat1</b> , <b>acaa2</b> , <b>ndufs1</b> , <b>atp5b</b> , <b>uqcrfs1</b> , <b>cyc1</b> , <b>mdh2</b> , <b>atp5a1</b> |
| organelle inner membrane                            | 12               | 285             | 4'21%  | cps1, hspd1, cox5b, <b>pc</b> , <b>acat1</b> , <b>acaa2</b> , <b>ndufs1</b> , <b>atp5b</b> , <b>uqcrfs1</b> , <b>cyc1</b> , <b>mdh2</b> , <b>atp5a1</b> |
| single-organism carbohydrate catabolic process      | 11               | 90              | 12'22% | cps1, aldoa, akr1a1, gapdh, eno1, c6pd, fbp1, gpd1, <b>taldo1</b> , <b>mif</b> , <b>aldob</b>                                                           |
| carbohydrate catabolic process                      | 11               | 95              | 11'58% | cps1, aldoa, akr1a1, gapdh, eno1, c6pd, fbp1, gpd1, <b>taldo1</b> , <b>mif</b> , <b>aldob</b>                                                           |
| energy derivation by oxidation of organic compounds | 11               | 137             | 8'03%  | cps1, gnmt, ogdh, aco2, suclg2, gpd1, aldh5a1, dlst, <b>ndufs1</b> , <b>mdh2</b> , <b>acadm</b>                                                         |
| monosaccharide catabolic process                    | 10               | 63              | 15'87% | aldoa, akr1a1, gapdh, eno1, g6pd, fbp1, gpd1, <b>taldo1</b> , <b>mif</b> , <b>aldob</b>                                                                 |
| dicarboxylic acid metabolic process                 | 10               | 76              | 13'16% | gnmt, ogdh, glul, suclg2, aldh5a1, got1, dlst, <b>mdh1</b> , <b>mdh2</b> , <b>pc</b>                                                                    |
| mitochondrial matrix                                | 10               | 132             | 7'58%  | cps1, acadl, ivd, suclg2, acss1, <b>acadm</b> , <b>acaa2</b> , <b>atp5b</b> , <b>acat1</b> , <b>mdh2</b>                                                |
| cofactor binding                                    | 10               | 148             | 6'76%  | acadl, fasn, pitpna, g6pd, alb, gpd1, aldh5a1, <b>acat1</b> , <b>acadm</b> , <b>mdh1</b>                                                                |
| small molecule catabolic process                    | 10               | 173             | 5'78%  | aldh5a1, acadl, got1, oxct1, akr1a1, ivd, <b>acadm</b> , <b>cpt2</b> , <b>acaa2</b>                                                                     |
| protein homooligomerization                         | 10               | 198             | 5'05%  | gnmt, glul, aldoa, fbp1, aldh5a1, ivd, acadl, <b>mif</b> , <b>acat1</b> , <b>acadm</b>                                                                  |
| carboxylic acid biosynthetic process                | 10               | 200             | 5'00%  | acss1, ckmt1b, acadl, got1, glul, fasn, akr1a1, <b>acadm</b> , <b>ckm</b> , <b>mif</b>                                                                  |

|                                                       |    |     |        |                                                                        |
|-------------------------------------------------------|----|-----|--------|------------------------------------------------------------------------|
| organic acid biosynthetic process                     | 10 | 200 | 5'00%  | acss1, ckmt1b, acadl, got1, glul, fasn, akr1a1, <b>acadm, ckm, mif</b> |
| adenyl ribonucleotide binding                         | 10 | 289 | 3'46%  | cps1, myh7, myh6, pebp1, fbp1, map2k1, <b>pc, atp5a1, atp5b</b>        |
| adenyl nucleotide binding                             | 10 | 293 | 3'41%  | cps1, myh7, myh6, pebp1, fbp1, map2k1, <b>pc, atp5a1, atp5b</b>        |
| glucose catabolic process                             | 9  | 57  | 15'79% | fbp1, gpd1, aldoa, gapdh, eno1, g6pd, <b>taldo1, mif, aldob</b>        |
| hexose catabolic process                              | 9  | 61  | 14'75% | fbp1, gpd1, aldoa, gapdh, eno1, g6pd, <b>taldo1, mif, aldob</b>        |
| coenzyme binding                                      | 9  | 110 | 8'18%  | acadl, fasn, pitpna, g6pd, gpd1, aldh5a1, <b>acat1, acadm, mdh1</b>    |
| carbohydrate biosynthetic process                     | 9  | 121 | 7'44%  | gnmt, got1, akr1a1, gapdh, g6pd, fbp1, gpd1, <b>pc, acadm</b>          |
| carboxylic acid catabolic process                     | 9  | 132 | 6'82%  | uroc1, acadl, got1, akr1a1, aldh5a1, ivd, <b>acadm, cpt2, acaa2</b>    |
| organic acid catabolic process                        | 9  | 132 | 6'82%  | uroc1, acadl, got1, akr1a1, aldh5a1, ivd, <b>acadm, cpt2, acaa2</b>    |
| carboxylic acid binding                               | 9  | 175 | 5'14%  | cps1, gnmt, got1, glul, pitpna, ddah1, alb, aldh5a1, <b>pc</b>         |
| organic acid binding                                  | 9  | 176 | 5'11%  | cps1, gnmt, got1, glul, pitpna, ddah1, alb, aldh5a1, <b>pc</b>         |
| fatty acid metabolic process                          | 9  | 235 | 3'83%  | acss1, aldh5a1, acadl, fasn, ivd, <b>acadm, cpt2, acaa2, mif</b>       |
| ATP binding                                           | 9  | 261 | 3'45%  | cps1, myh7, myh6, pebp1, fbp1, map2k1, glul, <b>pc, atp5a1, atp5b</b>  |
| nicotinamide nucleotide metabolic process             | 8  | 43  | 18'60% | gpd1, dlst, ogdh, g6pd, <b>mdh2, mdh1, taldo1, aldob</b>               |
| pyridine nucleotide metabolic process                 | 8  | 43  | 18'60% | gpd1, dlst, ogdh, g6pd, <b>mdh2, mdh1, taldo1, aldob</b>               |
| pyridine-containing compound metabolic process        | 8  | 51  | 15'69% | gpd1, dlst, ogdh, g6pd, <b>mdh2, mdh1, taldo1, aldob</b>               |
| monosaccharide biosynthetic process                   | 8  | 51  | 15'69% | gnmt, akr1a1, gapdh, g6pd, fbp1, gpd1, <b>pc, acadm</b>                |
| oxidoreduction coenzyme metabolic process             | 8  | 51  | 15'69% | gpd1, dlst, ogdh, g6pd, <b>mdh2, mdh1, taldo1, aldob</b>               |
| cellular respiration                                  | 8  | 69  | 11'59% | aldh5a1, ogdh, aco2, suclg2, gpd1, dlst, <b>ndufs1, mdh2</b>           |
| cellular modified amino acid metabolic process        | 8  | 145 | 5'52%  | cps1, gnmt, ckb, ddah1, ckmt1b, g6pd, aldh5a1, <b>ckm</b>              |
| alpha-amino acid metabolic process                    | 8  | 154 | 5'19%  | cps1, gnmt, got1, glul, ddah1, aldh5a1, ivd, uroc1                     |
| purine ribonucleoside monophosphate metabolic process | 8  | 199 | 4'02%  | adk, myh7, myh6, nsf, aldoa, <b>atp5a1, atp5b, ndufs1</b>              |
| purine nucleoside monophosphate metabolic process     | 8  | 200 | 4'00%  | adk, myh7, myh6, nsf, aldoa, <b>atp5a1, atp5b, ndufs1</b>              |
| ribonucleoside monophosphate metabolic process        | 8  | 203 | 3'94%  | adk, myh7, myh6, nsf, aldoa, <b>atp5a1, atp5b, ndufs1</b>              |
| nucleoside monophosphate metabolic process            | 8  | 214 | 3'74%  | adk, myh7, myh6, nsf, aldoa, <b>atp5a1, atp5b, ndufs1</b>              |
| glycolysis                                            | 7  | 46  | 15'22% | fbp1, gpd1, aldoa, gapdh, eno1, <b>mif, aldob</b>                      |
| monocarboxylic acid catabolic process                 | 7  | 76  | 9'21%  | acadl, akr1a1, aldh5a1, ivd, <b>acadm, cpt2, acaa2</b>                 |
| ATP metabolic process                                 | 7  | 179 | 3'91%  | aldoa, myh7, myh6, nsf, <b>atp5a1, atp5b, ndufs1</b>                   |
| cellular carbohydrate metabolic process               | 7  | 191 | 3'66%  | cps1, gnmt, got1, fbp1, gpd1, <b>acadm, mif</b>                        |

|                                       |   |     |       |                                                          |
|---------------------------------------|---|-----|-------|----------------------------------------------------------|
| response to glucocorticoid            | 7 | 218 | 3'21% | cps1, got1, pebp1, map2k1, <b>acadm, mif, aldob</b>      |
| response to corticosteroid            | 7 | 232 | 3'02% | cps1, got1, pebp1, map2k1, <b>acadm, mif, aldob</b>      |
| monovalent inorganic cation transport | 7 | 283 | 2'47% | atp6v1b1, cox5b, nsf, <b>uqcrfs1, atp5a1, atp5b, mif</b> |

**Suppl. Table 2:** Network analysis serum functions absolute number. Thirty-three functions filtered by absolute number (cut-off  $\geq 6$ ) from the original 166 deriving from GeneMania<sup>®</sup> network analysis of the serum-protein dataset. Column 1 shows the functions names. Columns 2 and 3 show respectively the number of annotated genes in the displayed network and the number of genes with that annotation in the genome. In column 5: names in bold letters represent the genes predicted by the software.

| Function                                      | Genes in network | Genes in genome | Ratio  | Names                                                                                                                           |
|-----------------------------------------------|------------------|-----------------|--------|---------------------------------------------------------------------------------------------------------------------------------|
| blood microparticle                           | 22               | 97              | 22'68% | apcs, hp, c3, tf, apoa1, cfb, apoe, serping1, fga, alb, itih4, gc, <b>ahsg, c9, hpx, fgb, pon1, ambp, apoa2, f2, c4bpa, fgg</b> |
| glycerolipid metabolic process                | 9                | 211             | 4'27%  | c3, apoa1, apoe, <b>apoa5, apoh, pon1, cps1, apoa2, apoc3</b>                                                                   |
| phospholipid binding                          | 9                | 222             | 4'05%  | apoe, apoa1, <b>apoa5, apoh, fabp1, pon1, cps1, apoa2, apoc3</b>                                                                |
| negative regulation of hydrolase activity     | 9                | 264             | 3'41%  | fetub, kng2, apoa1, serping1, <b>serpina1, fabp1, ambp, apoa2, apoc3</b>                                                        |
| lipid transport                               | 8                | 174             | 4'60%  | apoe, apoa1, <b>apoa5, apoh, fabp1, pon1, apoa2, apoc3</b>                                                                      |
| regeneration                                  | 8                | 184             | 4'35%  | fga, hp, apoa1, apoe, <b>apoa5, ahsg, apoa2, apoh</b>                                                                           |
| enzyme inhibitor activity                     | 8                | 197             | 4'06%  | fetub, apoa1, serping1, <b>serpina1, ahsg, ambp, apoa2, apoc3</b>                                                               |
| wound healing                                 | 8                | 287             | 2'79%  | fga, c3, apoe, <b>apoa5, c9, fgb, f2, apoh</b>                                                                                  |
| high-density lipoprotein particle             | 7                | 15              | 46'67% | apoe, apoa1, <b>apoa5, apoh, pon1, apoa2, apoc3</b>                                                                             |
| plasma lipoprotein particle                   | 7                | 19              | 36'84% | apoe, apoa1, <b>apoa5, apoh, pon1, apoa2, apoc3</b>                                                                             |
| protein-lipid complex                         | 7                | 20              | 35'00% | apoe, apoa1, <b>apoa5, apoh, pon1, apoa2, apoc3</b>                                                                             |
| acylglycerol metabolic process                | 7                | 75              | 9'33%  | c3, apoe, <b>apoa5, apoh, apoc3, apoa2, cps1</b>                                                                                |
| neutral lipid metabolic process               | 7                | 77              | 9'09%  | c3, apoe, <b>apoa5, apoh, apoc3, apoa2, cps1</b>                                                                                |
| acute inflammatory response                   | 7                | 96              | 7'29%  | hp, c3, tf, itih4, serping1, <b>ahsg, apoa2</b>                                                                                 |
| lipid localization                            | 7                | 136             | 5'15%  | apoe, apoa1, <b>apoa5, apoh, fabp1, apoa2, apoc3</b>                                                                            |
| regulation of lipid metabolic process         | 7                | 229             | 3'06%  | c3, apoa1, apoe, <b>apoa5, fabp1, apoa2, apoc3</b>                                                                              |
| regulation of body fluid levels               | 7                | 246             | 2'85%  | c3, apoe, gc, fga, <b>c9, f2, apoh</b>                                                                                          |
| extracellular matrix                          | 7                | 262             | 2'67%  | apcs, alb, tf, rbp3, <b>f2, apoh, ahsg</b>                                                                                      |
| triglyceride-rich lipoprotein particle        | 6                | 14              | 42'86% | apoe, apoa1, <b>apoa5, apoh, apoc3, apoa2</b>                                                                                   |
| very-low-density lipoprotein particle         | 6                | 14              | 42'86% | apoe, apoa1, <b>apoa5, apoh, apoc3, apoa2</b>                                                                                   |
| triglyceride metabolic process                | 6                | 67              | 8'96%  | c3, apoe, <b>apoa5, apoh, apoc3, cps1</b>                                                                                       |
| organ regeneration                            | 6                | 92              | 6'52%  | hp, apoa1, <b>apoa5, ahsg, apoa2, apoh</b>                                                                                      |
| blood coagulation                             | 6                | 110             | 5'45%  | c3, apoe, fga, <b>c9, f2, apoh</b>                                                                                              |
| hemostasis                                    | 6                | 112             | 5'36%  | c3, apoe, fga, <b>c9, f2, apoh</b>                                                                                              |
| coagulation                                   | 6                | 115             | 5'22%  | c3, apoe, fga, <b>c9, f2, apoh</b>                                                                                              |
| negative regulation of endopeptidase activity | 6                | 156             | 3'85%  | fetub, kng2, serping1, <b>serpina1, fabp1, ambp</b>                                                                             |

| Function                                  | Genes in network | Genes in genome | Ratio | Names                                               |
|-------------------------------------------|------------------|-----------------|-------|-----------------------------------------------------|
| lipid catabolic process                   | 6                | 157             | 3'82% | apoe, <b>apoa5, fabp1, cps1, apoa2, apoc3</b>       |
| negative regulation of peptidase activity | 6                | 159             | 3'77% | fetub, kng2, serping1, <b>serpina1, fabp1, ambp</b> |
| steroid metabolic process                 | 6                | 200             | 3'00% | gc, apoa1, apoe, <b>apoc3, pon1, apoa2</b>          |
| alcohol metabolic process                 | 6                | 211             | 2'84% | gc, apoa1, apoe, <b>apoc3, pon1, apoa2</b>          |
| regulation of endopeptidase activity      | 6                | 276             | 2'17% | fetub, kng2, serping1, <b>serpina1, fabp1, ambp</b> |
| organic anion transport                   | 6                | 279             | 2'15% | dpysl2, apoa1, apoe, <b>apoc3, fabp1, apoa2</b>     |
| regulation of peptidase activity          | 6                | 288             | 2'08% | fetub, kng2, serping1, <b>serpina1, fabp1, ambp</b> |

1  
2  
3  
4  
5  
6  
7  
8  
9  
10  
11  
12  
13  
14  
15  
16  
17  
18  
19  
20  
21  
22  
23

**Suppl. Table 3:** Subcluster 2 (gpd1, eno1, ald5a1, coro1a, atp6v1b2, ckb, alb, fasn, acy1, fbp1, fscn1, ald7a1, cct3, gpd1, ogdh, oxct1, ca1). Seventeen functions filtered by prevalence (cut-off  $\geq 10\%$ ) from the original 51 deriving from GeneMania<sup>®</sup> network analysis of the whole dataset without the serum proteins. Column 1 shows the functions names. Columns 2 and 3 show respectively the number of annotated genes in the displayed network and the number of genes with that annotation in the genome. In column 5: names in bold letters represent the genes predicted by the software.

| Function                                                                                        | Genes in network | Genes in genome | Ratio  | Names                                |
|-------------------------------------------------------------------------------------------------|------------------|-----------------|--------|--------------------------------------|
| NADH metabolic process                                                                          | 3                | 12              | 25'00% | gpd1, ogdh, <b>aldob</b>             |
| ribonucleoside diphosphate biosynthetic process                                                 | 2                | 10              | 20'00% | <b>atp5a1, atp5b</b>                 |
| carbohydrate phosphatase activity                                                               | 2                | 10              | 20'00% | fbp1, <b>fbp2</b>                    |
| ADP metabolic process                                                                           | 2                | 11              | 18'18% | <b>atp5a1, atp5b</b>                 |
| MHC class I protein binding                                                                     | 2                | 11              | 18'18% | <b>atp5a1, atp5b</b>                 |
| sterol esterification                                                                           | 2                | 12              | 16'67% | <b>apoa2, scd</b>                    |
| cholesterol esterification                                                                      | 2                | 12              | 16'67% | <b>apoa2, scd</b>                    |
| steroid esterification                                                                          | 2                | 12              | 16'67% | <b>apoa2, scd</b>                    |
| acetyl-CoA biosynthetic process                                                                 | 2                | 13              | 15'38% | <b>acly, pdhb</b>                    |
| nucleoside diphosphate biosynthetic process                                                     | 2                | 13              | 15'38% | <b>atp5a1, atp5b</b>                 |
| oxidoreductase activity, acting on the aldehyde or oxo group of donors                          | 4                | 31              | 12'90% | ald7a1, ald5a1, ogdh, <b>pdhb</b>    |
| NAD metabolic process                                                                           | 3                | 24              | 12'50% | gpd1, ogdh, <b>aldob</b>             |
| oxidoreductase activity, acting on the aldehyde or oxo group of donors, NAD or NADP as acceptor | 3                | 25              | 12'00% | ald7a1, ald5a1, ogdh                 |
| acetyl-CoA metabolic process                                                                    | 3                | 26              | 11'54% | fasn, <b>acly, pdhb</b>              |
| gluconeogenesis                                                                                 | 5                | 44              | 11'36% | fbp1, gpd1, <b>pgk1, fbp2, rbp4</b>  |
| hexose biosynthetic process                                                                     | 5                | 46              | 10'87% | fbp1, gpd1, <b>pgk1, fbp2, rbp4</b>  |
| glycolysis                                                                                      | 5                | 46              | 10'87% | fbp1, eno1, gpd1, <b>pgk1, aldob</b> |



**Suppl. Table 4:** Subcluster 2 (gpd1, eno1, aldh5a1, coro1a, atp6v1b2, ckb, alb, fasn, acy1, fbp1, fscn1, aldh7a1, cct3, gpd1, ogdh, oxct1, ca1). Nineteen functions filtered by absolute number (cut-off  $\geq 5$ ) from the original 51 deriving from GeneMania<sup>®</sup> network analysis of the whole dataset without the serum proteins. Column 1 shows the functions names. Columns 2 and 3 show respectively the number of annotated genes in the displayed network and the number of genes with that annotation in the genome. In column 5: names in bold letters represent the genes predicted by the software.

| Function                                       | Genes in network | Genes in genome | Ratio  | Names                                                     |
|------------------------------------------------|------------------|-----------------|--------|-----------------------------------------------------------|
| glucose metabolic process                      | 8                | 171             | 4'68%  | fbp1, aldh5a1, gpd1, eno1, <b>pgk1, fbp2, aldob, rbp4</b> |
| hexose metabolic process                       | 8                | 186             | 4'30%  | fbp1, aldh5a1, gpd1, eno1, <b>pgk1, fbp2, aldob, rbp4</b> |
| generation of precursor metabolites and energy | 8                | 196             | 4'08%  | fbp1, aldh5a1, gpd1, eno1, ogdh, <b>pgk1, pdhb, aldob</b> |
| monosaccharide metabolic process               | 8                | 199             | 4'02%  | fbp1, aldh5a1, gpd1, eno1, <b>pgk1, fbp2, aldob, rbp4</b> |
| coenzyme metabolic process                     | 7                | 161             | 4'35%  | gpd1, fasn, ogdh, <b>acly, pdhb, acot2, aldob</b>         |
| cofactor metabolic process                     | 7                | 196             | 3'57%  | gpd1, fasn, ogdh, <b>acly, pdhb, acot2, aldob</b>         |
| fatty acid metabolic process                   | 6                | 235             | 2'55%  | aldh5a1, fasn, <b>acly, acot2, scd, fabp1</b>             |
| gluconeogenesis                                | 5                | 44              | 11'36% | fbp1, gpd1, <b>pgk1, fbp2, rbp4</b>                       |
| hexose biosynthetic process                    | 5                | 46              | 10'87% | fbp1, gpd1, <b>pgk1, fbp2, rbp4</b>                       |
| glycolysis                                     | 5                | 46              | 10'87% | fbp1, eno1, gpd1, <b>pgk1, aldob</b>                      |
| monosaccharide biosynthetic process            | 5                | 51              | 9'80%  | fbp1, gpd1, <b>pgk1, fbp2, rbp4</b>                       |
| acyl-CoA metabolic process                     | 5                | 53              | 9'43%  | fasn, ogdh, <b>acot2, pdhb, acly</b>                      |
| thioester metabolic process                    | 5                | 53              | 9'43%  | fasn, ogdh, <b>acot2, pdhb, acly</b>                      |
| glucose catabolic process                      | 5                | 57              | 8'77%  | fbp1, eno1, gpd1, <b>pgk1, aldob</b>                      |
| hexose catabolic process                       | 5                | 61              | 8'20%  | fbp1, eno1, gpd1, <b>pgk1, aldob</b>                      |
| monosaccharide catabolic process               | 5                | 63              | 7'94%  | fbp1, eno1, gpd1, <b>pgk1, aldob</b>                      |
| single-organism carbohydrate catabolic process | 5                | 90              | 5'56%  | fbp1, eno1, gpd1, <b>pgk1, aldob</b>                      |
| carbohydrate catabolic process                 | 5                | 95              | 5'26%  | fbp1, eno1, gpd1, <b>pgk1, aldob</b>                      |
| carbohydrate biosynthetic process              | 5                | 121             | 4'13%  | fbp1, gpd1, <b>pgk1, fbp2, rbp4</b>                       |

**Suppl. Table 5:** Subcluster 3 (gapdh, cps1, aldoa, glul, myh6, myh7, oplah, got1, acss1). Twenty functions filtered by prevalence (cut-off  $\geq 10\%$ ) from the original 90 deriving from GeneMania<sup>®</sup> network analysis of the whole dataset without the serum proteins. Column 1 shows the functions names. Columns 2 and 3 show respectively the number of annotated genes in the displayed network and the number of genes with that annotation in the genome. In column 5: names in bold letters represent the genes predicted by the software.

| Function                                                | Genes in network | Genes in genome | Ratio  | Names                             |
|---------------------------------------------------------|------------------|-----------------|--------|-----------------------------------|
| striated muscle thin filament                           | 4                | 13              | 30'77% | <b>tnni1, tnnt3, tnnc2, acta1</b> |
| myofilament                                             | 4                | 15              | 26'67% | <b>tnni1, tnnt3, tnnc2, acta1</b> |
| actin-dependent ATPase activity                         | 2                | 13              | 15'38% | myh6, myh7                        |
| structural constituent of muscle                        | 3                | 20              | 15'00% | myh6, myh7, <b>mylplf</b>         |
| ATP biosynthetic process                                | 3                | 20              | 15'00% | aldoa, <b>atp5b, pkm</b>          |
| microfilament motor activity                            | 2                | 14              | 14'29% | myh6, myh7                        |
| glutamate binding                                       | 2                | 14              | 14'29% | glul, cps1                        |
| myosin II complex                                       | 2                | 14              | 14'29% | myh6, myh7                        |
| purine ribonucleoside triphosphate biosynthetic process | 3                | 22              | 13'64% | aldoa, <b>atp5b, pkm</b>          |
| purine nucleoside triphosphate biosynthetic process     | 3                | 23              | 13'04% | aldoa, <b>atp5b, pkm</b>          |
| ribonucleoside triphosphate biosynthetic process        | 3                | 24              | 12'50% | aldoa, <b>atp5b, pkm</b>          |
| adult heart development                                 | 2                | 16              | 12'50% | myh6, myh7                        |
| transferase activity, transferring nitrogenous groups   | 2                | 17              | 11'76% | got1, gapdh                       |
| regulation of the force of heart contraction            | 3                | 26              | 11'54% | myh6, <b>atp2a2, myl3</b>         |
| myosin complex                                          | 3                | 26              | 11'54% | myh6, myh7, <b>myl3</b>           |
| glycogen catabolic process                              | 2                | 18              | 11'11% | cps1, <b>pygm</b>                 |
| cellular polysaccharide catabolic process               | 2                | 18              | 11'11% | cps1, <b>pygm</b>                 |
| glucan catabolic process                                | 2                | 18              | 11'11% | cps1, <b>pygm</b>                 |
| polysaccharide catabolic process                        | 2                | 18              | 11'11% | cps1, <b>pygm</b>                 |
| glutamate metabolic process                             | 2                | 20              | 10'00% | got1, glul                        |

**Suppl. Table 6:** Subcluster 3 (gapdh, cps1, aldoa, glul, myh6, myh7, oplah, got1, acss1). Twenty-seven functions filtered by absolute number (cut-off  $\geq 5$ ) from the original 90 deriving from GeneMania<sup>®</sup> network analysis of the whole dataset without the serum proteins. Column 1 shows the functions names. Columns 2 and 3 show respectively the number of annotated genes in the displayed network and the number of genes with that annotation in the genome. In column 5: names in bold letters represent the genes predicted by the software.

| Function                                              | Genes in network | Genes in genome | Ratio | Names                                                                                                                                                                    |
|-------------------------------------------------------|------------------|-----------------|-------|--------------------------------------------------------------------------------------------------------------------------------------------------------------------------|
| muscle system process                                 | 13               | 242             | 5'37% | myh6, myh7, aldoa, <b>tnnt3</b> , <b>actn2</b> , <b>atp2a2</b> , <b>tnni1</b> , <b>myl3</b> , <b>mybpc2</b> , <b>tnnc2</b> , <b>mylpf</b> , <b>acta1</b> , <b>mybpc1</b> |
| muscle contraction                                    | 12               | 198             | 6'06% | myh6, myh7, aldoa, <b>tnnt3</b> , <b>actn2</b> , <b>atp2a2</b> , <b>tnni1</b> , <b>myl3</b> , <b>mybpc2</b> , <b>tnnc2</b> , <b>mylpf</b> , <b>mybpc1</b>                |
| sarcomere                                             | 8                | 140             | 5'71% | myh6, myh7, <b>tnnt3</b> , <b>tnnc2</b> , <b>actn2</b> , <b>acta1</b> , <b>tnni1</b> , <b>myl3</b>                                                                       |
| contractile fiber part                                | 8                | 153             | 5'23% | myh6, myh7, <b>tnnt3</b> , <b>tnnc2</b> , <b>actn2</b> , <b>acta1</b> , <b>tnni1</b> , <b>myl3</b>                                                                       |
| myofibril                                             | 8                | 167             | 4'79% | myh6, myh7, <b>tnnt3</b> , <b>tnnc2</b> , <b>actn2</b> , <b>acta1</b> , <b>tnni1</b> , <b>myl3</b>                                                                       |
| contractile fiber                                     | 8                | 176             | 4'55% | myh6, myh7, <b>tnnt3</b> , <b>tnnc2</b> , <b>actn2</b> , <b>acta1</b> , <b>tnni1</b> , <b>myl3</b>                                                                       |
| adenyl ribonucleotide binding                         | 8                | 289             | 2'77% | myh6, myh7, glul, cps1, <b>pkm</b> , <b>pygm</b> , <b>atp5b</b> , <b>atp2a2</b>                                                                                          |
| adenyl nucleotide binding                             | 8                | 293             | 2'73% | myh6, myh7, glul, cps1, <b>pkm</b> , <b>pygm</b> , <b>atp5b</b> , <b>atp2a2</b>                                                                                          |
| ATP metabolic process                                 | 7                | 179             | 3'91% | myh6, myh7, aldoa, <b>pkm</b> , <b>atp2a2</b> , <b>atp5b</b> , <b>tnnt3</b>                                                                                              |
| purine ribonucleoside monophosphate metabolic process | 7                | 199             | 3'52% | myh6, myh7, aldoa, <b>pkm</b> , <b>atp2a2</b> , <b>atp5b</b> , <b>tnnt3</b>                                                                                              |
| purine nucleoside monophosphate metabolic process     | 7                | 200             | 3'50% | myh6, myh7, aldoa, <b>pkm</b> , <b>atp2a2</b> , <b>atp5b</b> , <b>tnnt3</b>                                                                                              |
| ribonucleoside monophosphate metabolic process        | 7                | 203             | 3'45% | myh6, myh7, aldoa, <b>pkm</b> , <b>atp2a2</b> , <b>atp5b</b> , <b>tnnt3</b>                                                                                              |
| nucleoside monophosphate metabolic process            | 7                | 214             | 3'27% | myh6, myh7, aldoa, <b>pkm</b> , <b>atp2a2</b> , <b>atp5b</b> , <b>tnnt3</b>                                                                                              |
| ATP binding                                           | 6                | 261             | 2'30% | myh6, myh7, glul, cps1, <b>atp5b</b> , <b>atp2a2</b>                                                                                                                     |
| single-organism carbohydrate catabolic process        | 5                | 90              | 5'56% | gapdh, aldoa, cps1, <b>pkm</b> , <b>pygm</b>                                                                                                                             |
| carbohydrate catabolic process                        | 5                | 95              | 5'26% | gapdh, aldoa, cps1, <b>pkm</b> , <b>pygm</b>                                                                                                                             |
| striated muscle contraction                           | 5                | 97              | 5'15% | myh6, aldoa, <b>tnnt3</b> , <b>tnnc2</b> , <b>myl3</b>                                                                                                                   |
| ATPase activity, coupled                              | 5                | 133             | 3'76% | myh6, myh7, <b>tnnt3</b> , <b>atp5b</b> , <b>atp2a2</b>                                                                                                                  |
| ATP catabolic process                                 | 5                | 152             | 3'29% | myh6, myh7, <b>tnnt3</b> , <b>atp5b</b> , <b>atp2a2</b>                                                                                                                  |
| purine ribonucleoside monophosphate catabolic process | 5                | 156             | 3'21% | myh6, myh7, <b>tnnt3</b> , <b>atp5b</b> , <b>atp2a2</b>                                                                                                                  |

| Function                                          | Genes in network | Genes in genome | Ratio | Names                                                   |
|---------------------------------------------------|------------------|-----------------|-------|---------------------------------------------------------|
| ribonucleoside monophosphate catabolic process    | 5                | 156             | 3'21% | myh6, myh7, <b>tnnt3</b> , <b>atp5b</b> , <b>atp2a2</b> |
| purine nucleoside monophosphate catabolic process | 5                | 157             | 3'18% | myh6, myh7, <b>tnnt3</b> , <b>atp5b</b> , <b>atp2a2</b> |
| nucleoside monophosphate catabolic process        | 5                | 159             | 3'14% | myh6, myh7, <b>tnnt3</b> , <b>atp5b</b> , <b>atp2a2</b> |
| ATPase activity                                   | 5                | 186             | 2'69% | myh6, myh7, <b>tnnt3</b> , <b>atp5b</b> , <b>atp2a2</b> |
| generation of precursor metabolites and energy    | 5                | 196             | 2'55% | gapdh, cps1, aldoa, <b>pkm</b> , <b>pygm</b>            |
| carboxylic acid biosynthetic process              | 5                | 200             | 2'50% | acss1, glul, got1, <b>ckm</b> , <b>pkm</b>              |
| organic acid biosynthetic process                 | 5                | 200             | 2'50% | acss1, glul, got1, <b>ckm</b> , <b>pkm</b>              |

1  
2  
3  
4  
5  
6  
7  
8  
9  
10  
11  
12  
13  
14  
15  
16  
17  
18  
19  
20  
21

**Suppl. Table 7:** Subcluster of similarly up-regulated proteins from the serum-protein dataset (c3, kng2, dpysl2, igh-6, apoa1, hp, alb, tf, gc, apoe, cfb). Forty-four functions filtered by prevalence (cut-off  $\geq 15\%$ ) from the original 190 deriving from GeneMania<sup>®</sup> network analysis of this subcluster dataset. Column 1 shows the functions names. Columns 2 and 3 show respectively the number of annotated genes in the displayed network and the number of genes with that annotation in the genome. In column 5: names in bold letters represent the genes predicted by the software

| Function                                               | Genes in network | Genes in genome | Ratio  | Names                                                |
|--------------------------------------------------------|------------------|-----------------|--------|------------------------------------------------------|
| triglyceride-rich lipoprotein particle                 | 7                | 14              | 50'00% | apoA1, apoe, <b>apoA4, apoh, apoc3, apoc1, apoA5</b> |
| very-low-density lipoprotein particle                  | 7                | 14              | 50'00% | apoA1, apoe, <b>apoA4, apoh, apoc3, apoc1, apoA5</b> |
| high-density lipoprotein particle                      | 7                | 15              | 46'67% | apoA1, apoe, <b>apoA4, apoh, apoc3, apoc1, apoA5</b> |
| phospholipid efflux                                    | 5                | 11              | 45'45% | apoA1, apoe, <b>apoA4, apoc3, apoc1</b>              |
| plasma lipoprotein particle                            | 7                | 19              | 36'84% | apoA1, apoe, <b>apoA4, apoh, apoc3, apoc1, apoA5</b> |
| protein-lipid complex                                  | 7                | 20              | 35'00% | apoA1, apoe, <b>apoA4, apoh, apoc3, apoc1, apoA5</b> |
| plasma lipoprotein particle remodeling                 | 6                | 18              | 33'33% | apoA1, apoe, <b>apoA4, apoc3, apoc1, apoA5</b>       |
| protein-lipid complex remodeling                       | 6                | 18              | 33'33% | apoA1, apoe, <b>apoA4, apoc3, apoc1, apoA5</b>       |
| macromolecular complex remodeling                      | 6                | 18              | 33'33% | apoA1, apoe, <b>apoA4, apoc3, apoc1, apoA5</b>       |
| lipase inhibitor activity                              | 3                | 10              | 30'00% | apoA1, <b>apoc1, apoc3</b>                           |
| sterol transporter activity                            | 3                | 10              | 30'00% | apoA1, apoe, <b>apoA4</b>                            |
| cholesterol transporter activity                       | 3                | 10              | 30'00% | apoA1, apoe, <b>apoA4</b>                            |
| reverse cholesterol transport                          | 3                | 11              | 27'27% | apoA1, apoe, <b>apoA4</b>                            |
| peripheral nervous system axon regeneration            | 3                | 12              | 25'00% | apoA1, apoe, <b>apoA4</b>                            |
| steroid esterification                                 | 3                | 12              | 25'00% | apoA1, apoe, <b>apoA4</b>                            |
| sterol esterification                                  | 3                | 12              | 25'00% | apoA1, apoe, <b>apoA4</b>                            |
| cholesterol esterification                             | 3                | 12              | 25'00% | apoA1, apoe, <b>apoA4</b>                            |
| negative regulation of lipase activity                 | 3                | 13              | 23'08% | apoA1, <b>apoc1, apoc3</b>                           |
| plasma lipoprotein particle organization               | 6                | 27              | 22'22% | apoA1, apoe, <b>apoA4, apoc3, apoc1, apoA5</b>       |
| protein-lipid complex subunit organization             | 6                | 29              | 20'69% | apoA1, apoe, <b>apoA4, apoc3, apoc1, apoA5</b>       |
| lipoprotein particle receptor binding                  | 4                | 20              | 20'00% | apoA1, apoe, <b>apoc3, apoA5</b>                     |
| triglyceride catabolic process                         | 3                | 15              | 20'00% | <b>apoc3, apoA5, apoA4</b>                           |
| negative regulation of fatty acid biosynthetic process | 2                | 10              | 20'00% | <b>apoc3, apoc1</b>                                  |
| lipase activator activity                              | 2                | 10              | 20'00% | <b>apoh, apoA5</b>                                   |
| negative regulation of cholesterol transport           | 2                | 10              | 20'00% | <b>apoc3, apoc1</b>                                  |
| negative regulation of sterol transport                | 2                | 10              | 20'00% | <b>apoc3, apoc1</b>                                  |
| high-density lipoprotein particle remodeling           | 2                | 10              | 20'00% | apoe, <b>apoc3</b>                                   |
| regulation of Cdc42 protein signal transduction        | 3                | 16              | 18'75% | apoA1, apoe, <b>apoc3</b>                            |
| mucosal immune response                                | 2                | 11              | 18'18% | <b>ltf, apoA4</b>                                    |

| Function                                               | Genes in network | Genes in genome | Ratio  | Names                                          |
|--------------------------------------------------------|------------------|-----------------|--------|------------------------------------------------|
| protein-lipid complex assembly                         | 3                | 17              | 17'65% | apoa1, apoe, <b>apoa4</b>                      |
| regulation of sterol transport                         | 5                | 29              | 17'24% | apoa1, apoe, <b>apoa4, apoc3, apoc1</b>        |
| regulation of cholesterol transport                    | 5                | 29              | 17'24% | apoa1, apoe, <b>apoa4, apoc3, apoc1</b>        |
| phospholipid transport                                 | 6                | 36              | 16'67% | apoa1, apoe, <b>apoa4, fabp1, apoc3, apoc1</b> |
| regulation of lipoprotein particle clearance           | 2                | 12              | 16'67% | <b>apoc3, apoc1</b>                            |
| organ or tissue specific immune response               | 2                | 12              | 16'67% | <b>ltf, apoa4</b>                              |
| regulation of triglyceride metabolic process           | 4                | 25              | 16'00% | c3, <b>apoa5, apoa4, apoc3</b>                 |
| regulation of fatty acid biosynthetic process          | 4                | 25              | 16'00% | <b>apoc3, apoc1, apoa5, apoa4</b>              |
| regulation of plasma lipoprotein particle levels       | 6                | 38              | 15'79% | apoa1, apoe, <b>apoa4, apoc3, apoc1, apoa5</b> |
| intestinal absorption                                  | 3                | 19              | 15'79% | apoa1, <b>apoa4, fabp1</b>                     |
| positive regulation of lipid catabolic process         | 3                | 19              | 15'79% | <b>fabp1, apoa5, apoa4</b>                     |
| positive regulation of fatty acid biosynthetic process | 2                | 13              | 15'38% | <b>apoa5, apoa4</b>                            |
| regulation of lipoprotein lipase activity              | 5                | 33              | 15'15% | <b>apoh, apoc3, apoc1, apoa5, apoa4</b>        |
| neutral lipid catabolic process                        | 3                | 20              | 15'00% | <b>apoc3, apoa5, apoa4</b>                     |
| acylglycerol catabolic process                         | 3                | 20              | 15'00% | <b>apoc3, apoa5, apoa4</b>                     |

1  
2  
3  
4  
5  
6  
7  
8  
9  
10  
11  
12  
13  
14  
15

**Suppl. Table 8:** Subcluster of similarly up-regulated proteins from the serum-protein dataset (c3, kng2, dpysl2, igh-6, apoa1, hp, alb, tf, gc, apoe, cfb). Fifty-nine functions filtered by absolute number (cut-off  $\geq 5$ ) from the original 190 deriving from GeneMania<sup>®</sup> network analysis of this subcluster dataset. Column 1 shows the functions names. Columns 2 and 3 show respectively the number of annotated genes in the displayed network and the number of genes with that annotation in the genome. In column 5: names in bold letters represent the genes predicted by the software.

| Function                                   | Genes in network | Genes in genome | Ratio  | Names                                                                       |
|--------------------------------------------|------------------|-----------------|--------|-----------------------------------------------------------------------------|
| blood microparticle                        | 13               | 97              | 13'40% | tf, hp, c3, apoa1, apoe, gc, cfb, alb, <b>ambp, itih4, ahsg, apoa4, atm</b> |
| lipid localization                         | 9                | 136             | 6'62%  | apoa1, apoe, <b>apo4, rbp4, apoh, fabp1, apoc3, apoc1, apo5</b>             |
| lipid transport                            | 9                | 174             | 5'17%  | apoa1, apoe, <b>apo4, rbp4, apoh, fabp1, apoc3, apoc1, apo5</b>             |
| regeneration                               | 8                | 184             | 4'35%  | hp, apoa1, apoe, <b>apo4, apoh, afp, apo5, ahsg</b>                         |
| glycerolipid metabolic process             | 8                | 211             | 3'79%  | c3, apoa1, apoe, <b>apo4, apoh, apoc3, apoc1, apo5</b>                      |
| regulation of lipid metabolic process      | 8                | 229             | 3'49%  | c3, apoa1, apoe, <b>apo4, fabp1, apoc3, apoc1, apo5</b>                     |
| triglyceride-rich lipoprotein particle     | 7                | 14              | 50'00% | apoa1, apoe, <b>apo4, apoh, apoc3, apoc1, apo5</b>                          |
| very-low-density lipoprotein particle      | 7                | 14              | 50'00% | apoa1, apoe, <b>apo4, apoh, apoc3, apoc1, apo5</b>                          |
| high-density lipoprotein particle          | 7                | 15              | 46'67% | apoa1, apoe, <b>apo4, apoh, apoc3, apoc1, apo5</b>                          |
| plasma lipoprotein particle                | 7                | 19              | 36'84% | apoa1, apoe, <b>apo4, apoh, apoc3, apoc1, apo5</b>                          |
| protein-lipid complex                      | 7                | 20              | 35'00% | apoa1, apoe, <b>apo4, apoh, apoc3, apoc1, apo5</b>                          |
| triglyceride metabolic process             | 7                | 67              | 10'45% | c3, apoe, <b>apo4, apoh, apoc3, apoc1, apo5</b>                             |
| acylglycerol metabolic process             | 7                | 75              | 9'33%  | c3, apoe, <b>apo4, apoh, apoc3, apoc1, apo5</b>                             |
| neutral lipid metabolic process            | 7                | 77              | 9'09%  | c3, apoe, <b>apo4, apoh, apoc3, apoc1, apo5</b>                             |
| steroid metabolic process                  | 7                | 200             | 3'50%  | gc, apoa1, apoe, <b>apo4, afp, apoc3, apoc1</b>                             |
| phospholipid binding                       | 7                | 222             | 3'15%  | apoa1, apoe, <b>apo4, apoh, fabp1, apoc3, apo5</b>                          |
| negative regulation of hydrolase activity  | 7                | 264             | 2'65%  | apoa1, kng2, <b>fabp1, ambp, serpina1, apoc3, apoc1</b>                     |
| organic anion transport                    | 7                | 279             | 2'51%  | dpysl2, apoa1, apoe, <b>apo4, fabp1, apoc3, apoc1</b>                       |
| plasma lipoprotein particle remodeling     | 6                | 18              | 33'33% | apoa1, apoe, <b>apo4, apoc3, apoc1, apo5</b>                                |
| protein-lipid complex remodeling           | 6                | 18              | 33'33% | apoa1, apoe, <b>apo4, apoc3, apoc1, apo5</b>                                |
| macromolecular complex remodeling          | 6                | 18              | 33'33% | apoa1, apoe, <b>apo4, apoc3, apoc1, apo5</b>                                |
| plasma lipoprotein particle organization   | 6                | 27              | 22'22% | apoa1, apoe, <b>apo4, apoc3, apoc1, apo5</b>                                |
| protein-lipid complex subunit organization | 6                | 29              | 20'69% | apoa1, apoe, <b>apo4, apoc3, apoc1, apo5</b>                                |
| phospholipid transport                     | 6                | 36              | 16'67% | apoa1, apoe, <b>apo4, fabp1, apoc3, apoc1</b>                               |

| Function                                         | Genes in network | Genes in genome | Ratio  | Names                                                                                 |
|--------------------------------------------------|------------------|-----------------|--------|---------------------------------------------------------------------------------------|
| regulation of plasma lipoprotein particle levels | 6                | 38              | 15'79% | apoa1, apoe, <b>apoa4</b> , <b>apoc3</b> , <b>apoc1</b> , <b>apoa5</b>                |
| organophosphate ester transport                  | 6                | 53              | 11'32% | apoa1, apoe, <b>apoa4</b> , <b>fabp1</b> , <b>apoc3</b> , <b>apoc1</b>                |
| lipid transporter activity                       | 6                | 55              | 10'91% | apoa1, apoe, <b>apoa4</b> , <b>rbp4</b> , <b>fabp1</b> , <b>apoc3</b>                 |
| regulation of lipase activity                    | 6                | 74              | 8'11%  | apoa1, <b>apoc1</b> , <b>apoa5</b> , <b>apoa4</b> , <b>apoh</b> , <b>apoc3</b>        |
| organ regeneration                               | 6                | 92              | 6'52%  | hp, apoa1, <b>apoa5</b> , <b>ahsg</b> , <b>apoh</b> , <b>afp</b>                      |
| regulation of lipid biosynthetic process         | 6                | 118             | 5'08%  | c3, apoe, <b>apoa4</b> , <b>apoc3</b> , <b>apoc1</b> , <b>apoa5</b>                   |
| cellular ketone metabolic process                | 6                | 145             | 4'14%  | <b>afp</b> , <b>apoc3</b> , <b>apoc1</b> , <b>apoa5</b> , <b>apoa4</b> , <b>fabp1</b> |
| lipid catabolic process                          | 6                | 157             | 3'82%  | apoe, <b>apoa4</b> , <b>fabp1</b> , <b>apoc3</b> , <b>apoc1</b> , <b>apoa5</b>        |
| enzyme inhibitor activity                        | 6                | 197             | 3'05%  | apoa1, <b>apoc1</b> , <b>ahsg</b> , <b>ambp</b> , <b>serpina1</b> , <b>apoc3</b>      |
| alcohol metabolic process                        | 6                | 211             | 2'84%  | gc, apoa1, apoe, <b>apoa4</b> , <b>apoc3</b> , <b>apoc1</b>                           |
| enzyme activator activity                        | 6                | 225             | 2'67%  | apoa1, apoe, <b>apoa4</b> , <b>apoh</b> , <b>ltf</b> , <b>apoa5</b>                   |
| phospholipid efflux                              | 5                | 11              | 45'45% | apoa1, apoe, <b>apoa4</b> , <b>apoc3</b> , <b>apoc1</b>                               |
| regulation of sterol transport                   | 5                | 29              | 17'24% | apoa1, apoe, <b>apoa4</b> , <b>apoc3</b> , <b>apoc1</b>                               |
| regulation of cholesterol transport              | 5                | 29              | 17'24% | apoa1, apoe, <b>apoa4</b> , <b>apoc3</b> , <b>apoc1</b>                               |
| regulation of lipoprotein lipase activity        | 5                | 33              | 15'15% | <b>apoh</b> , <b>apoc3</b> , <b>apoc1</b> , <b>apoa5</b> , <b>apoa4</b>               |
| cholesterol efflux                               | 5                | 36              | 13'89% | apoa1, apoe, <b>apoa4</b> , <b>apoc3</b> , <b>apoc1</b>                               |
| regulation of lipid catabolic process            | 5                | 42              | 11'90% | <b>fabp1</b> , <b>apoc3</b> , <b>apoc1</b> , <b>apoa5</b> , <b>apoa4</b>              |
| cholesterol transport                            | 5                | 55              | 9'09%  | apoa1, apoe, <b>apoa4</b> , <b>apoc3</b> , <b>apoc1</b>                               |
| sterol transport                                 | 5                | 55              | 9'09%  | apoa1, apoe, <b>apoa4</b> , <b>apoc3</b> , <b>apoc1</b>                               |
| cholesterol homeostasis                          | 5                | 57              | 8'77%  | apoa1, apoe, <b>apoa4</b> , <b>apoc3</b> , <b>apoa5</b>                               |
| sterol homeostasis                               | 5                | 58              | 8'62%  | apoa1, apoe, <b>apoa4</b> , <b>apoc3</b> , <b>apoa5</b>                               |
| regulation of fatty acid metabolic process       | 5                | 59              | 8'47%  | <b>fabp1</b> , <b>apoc3</b> , <b>apoc1</b> , <b>apoa5</b> , <b>apoa4</b>              |
| regulation of lipid transport                    | 5                | 75              | 6'67%  | apoa1, apoe, <b>apoa4</b> , <b>apoc3</b> , <b>apoc1</b>                               |
| cholesterol metabolic process                    | 5                | 80              | 6'25%  | apoa1, apoe, <b>apoa4</b> , <b>apoc3</b> , <b>apoc1</b>                               |
| sterol metabolic process                         | 5                | 81              | 6'17%  | apoa1, apoe, <b>apoa4</b> , <b>apoc3</b> , <b>apoc1</b>                               |
| lipid homeostasis                                | 5                | 87              | 5'75%  | apoa1, apoe, <b>apoa4</b> , <b>apoc3</b> , <b>apoa5</b>                               |
| acute inflammatory response                      | 5                | 96              | 5'21%  | tf, hp, c3, <b>itih4</b> , <b>ahsg</b>                                                |
| regulation of cellular ketone metabolic process  | 5                | 102             | 4'90%  | <b>fabp1</b> , <b>apoc3</b> , <b>apoc1</b> , <b>apoa5</b> , <b>apoa4</b>              |
| positive regulation of lipid metabolic process   | 5                | 106             | 4'72%  | apoa1, apoe, <b>apoa4</b> , <b>fabp1</b> , <b>apoa5</b>                               |
| cellular lipid catabolic process                 | 5                | 123             | 4'07%  | <b>fabp1</b> , <b>apoc3</b> , <b>apoc1</b> , <b>apoa5</b> , <b>apoa4</b>              |
| organic hydroxy compound transport               | 5                | 140             | 3'57%  | apoa1, apoe, <b>apoa4</b> , <b>apoc3</b> , <b>apoc1</b>                               |
| tissue homeostasis                               | 5                | 170             | 2'94%  | tf, alb, <b>ahsg</b> , <b>rbp4</b> , <b>ltf</b>                                       |
| anatomical structure homeostasis                 | 5                | 224             | 2'23%  | tf, alb, <b>ahsg</b> , <b>rbp4</b> , <b>ltf</b>                                       |
| fatty acid metabolic process                     | 5                | 235             | 2'13%  | <b>fabp1</b> , <b>apoc3</b> , <b>apoc1</b> , <b>apoa5</b> , <b>apoa4</b>              |
| transition metal ion binding                     | 5                | 239             | 2'09%  | tf, alb, <b>apoa4</b> , <b>meltf</b> , <b>ltf</b>                                     |
